# Supplementary material
Source: PubMed Central journal article supplement (PMC8474758)
Supplement: mmc1.pdf [file mmc1.pdf]

# Investigating the first stage of the COVID-19 pandemic in Ukraine using epidemiological and genomic data

Yuriy Gankin<sup>a,\*</sup>, Alina Nemira<sup>b,\*</sup>, Vladimir Koniukhovskii<sup>c,\*</sup>, Gerardo Chowell<sup>d</sup>, Thomas A. Weppelmann<sup>e</sup>, Pavel Skums<sup>b,\*\*</sup>, Alexander Kirpich<sup>d,\*\*</sup>

<sup>a</sup>*Quantori, Cambridge, Massachusetts, United States of America*

<sup>b</sup>*Department of Computer Science, Georgia State University, Atlanta, Georgia, United States of America*

<sup>c</sup>*EPAM Systems, Saint Petersburg, Russian Federation*

<sup>d</sup>*Department of Population Health Sciences, School of Public Health, Georgia State University, Atlanta, Georgia, United States of America*

<sup>e</sup>*Department of Internal Medicine, University of South Florida, Tampa, Florida, United States*

---

## Abstract

This is the supplementary information that was not included in the main manuscript body.

---

---

\*Equal Contribution

\*\*Equal Contribution

Corresponding Author: Alexander Kirpich

*Email address:* [akirpich@gsu.edu](mailto:akirpich@gsu.edu) (Alexander Kirpich)

## Appendix

### *The Ukrainian Transmission Clusters*

The visualizations of seven largest intra-Ukrainian transmission clusters are presented in Figures A1-A7. The numbering of clusters corresponds to the one presented in Figures 3 and 4.

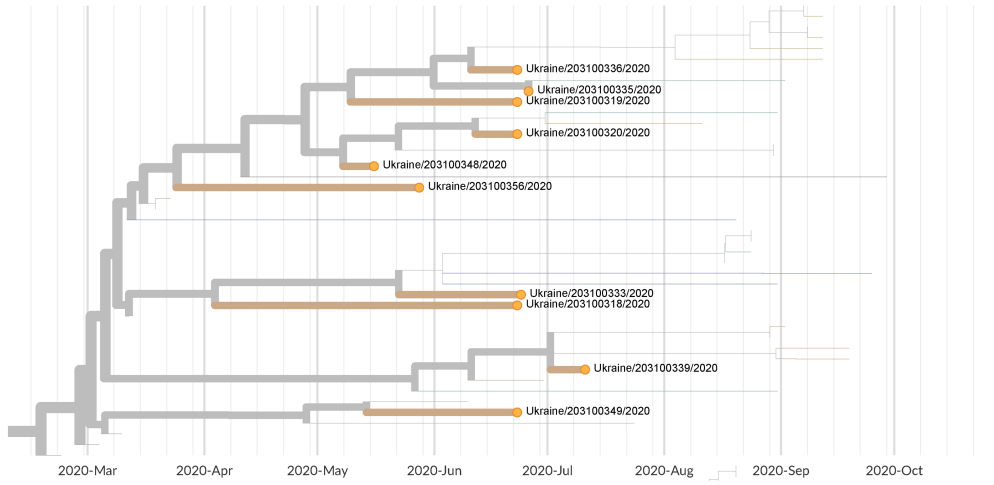

Figure A1: Cluster 1.

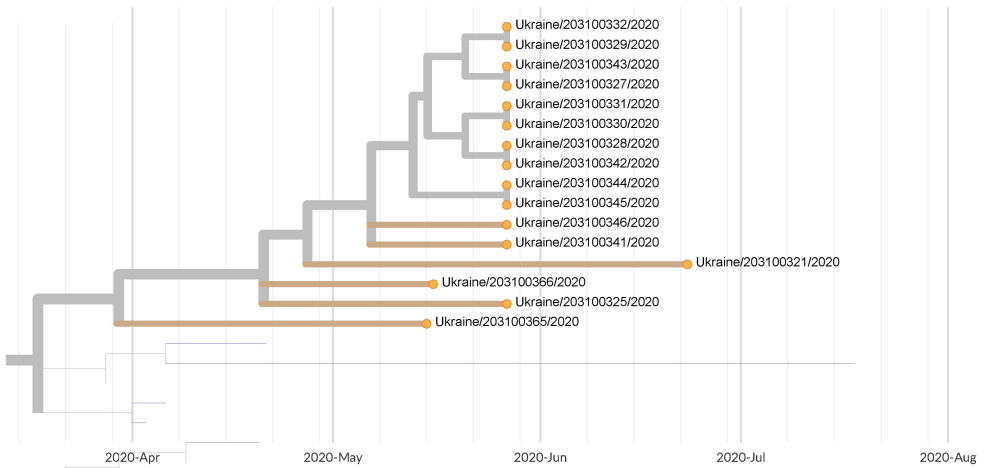

Figure A2: Cluster 2.



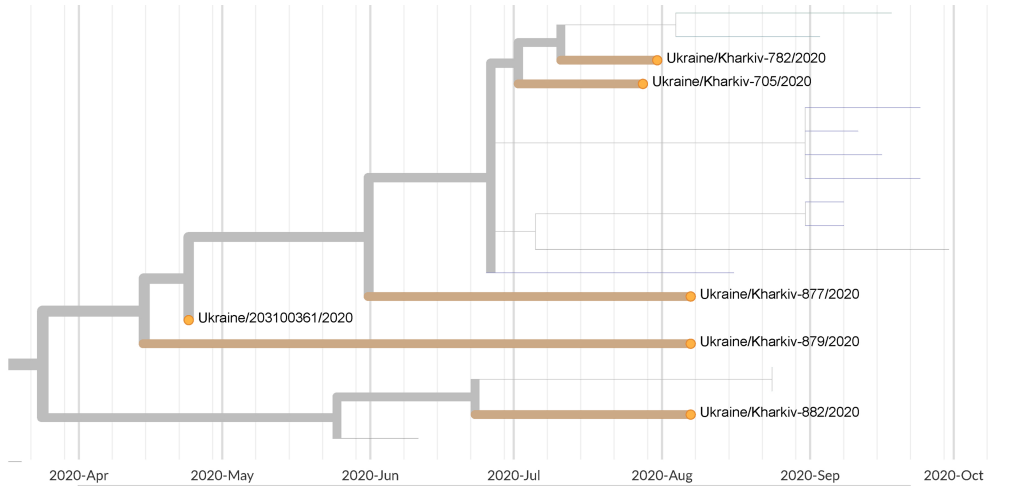

Figure A3: Cluster 3.

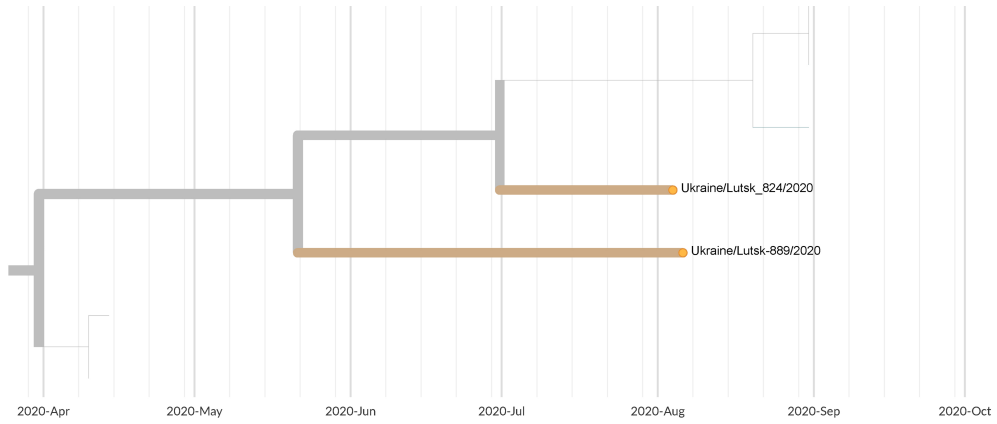

Figure A4: Cluster 4.

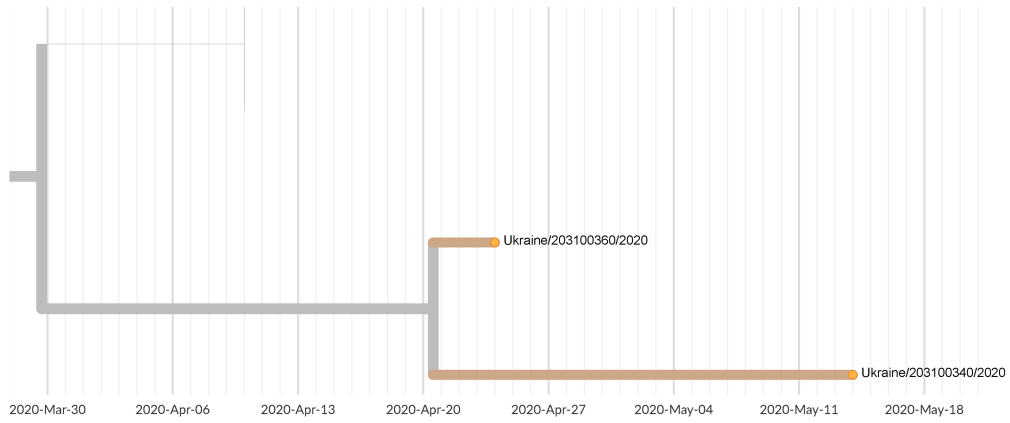

Figure A5: Cluster 5.

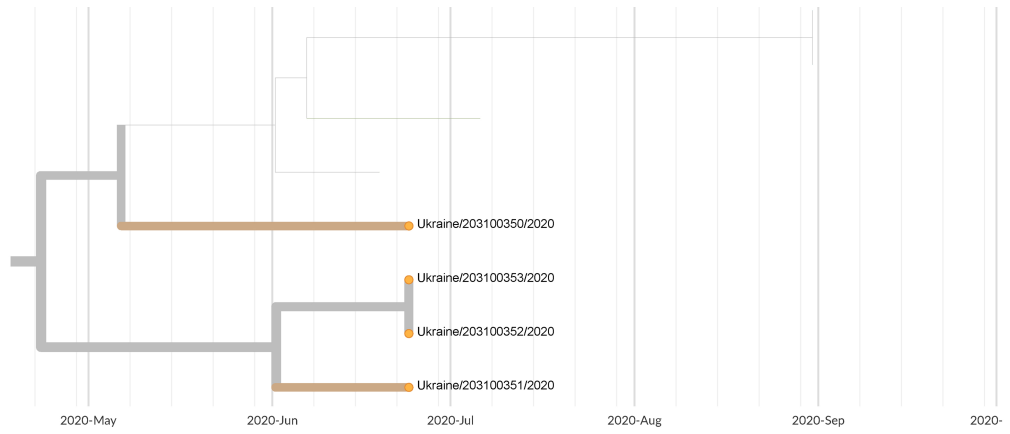

Figure A6: Cluster 6.

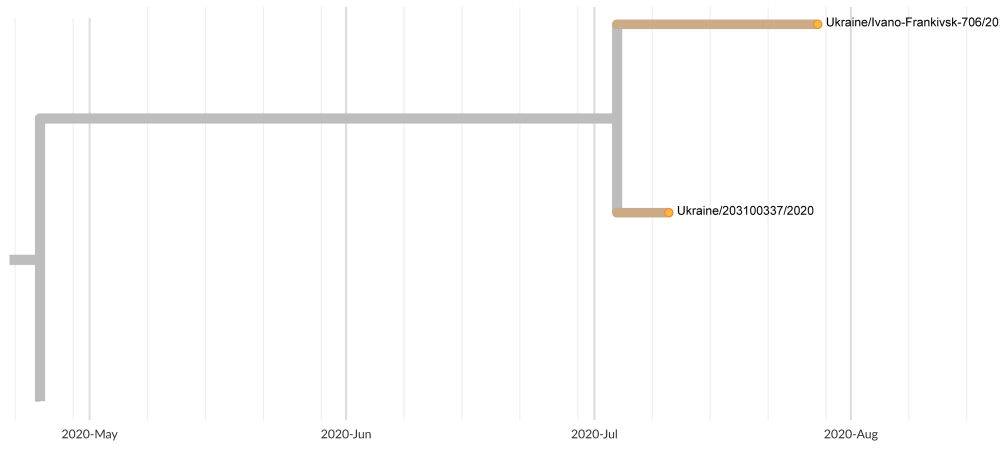

Figure A7: Cluster 7.

### TMRCAs

The TMRCAs have been produced using Nextstrain together with the corresponding 95% confidence intervals. The results are presented in Table A2.

| Name      | TMRCA & CI                          | Parent TMRCA & CI                   | March 17  |
|-----------|-------------------------------------|-------------------------------------|-----------|
| Cluster 1 | 2020-03-06 (2020-02-29; 2020-03-10) | 2020-03-02 (2020-02-24; 2020-03-08) | Before    |
| Cluster 2 | 2020-03-30 (2020-03-11; 2020-05-03) | 2020-03-18 (2020-03-11; 2020-03-26) | Undecided |
| Cluster 3 | 2020-03-25 (2020-03-15; 2020-04-12) | 2020-03-14 (2020-03-05; 2020-03-19) | Undecided |
| Cluster 4 | 2020-05-22 (2020-03-25; 2020-06-17) | 2020-03-31 (2020-03-22; 2020-04-07) | After     |
| Cluster 5 | 2020-04-21 (2020-04-12; 2020-04-24) | 2020-03-30 (2020-03-19; 2020-04-07) | After     |
| Cluster 6 | 2020-04-23 (2020-03-29; 2020-05-15) | 2020-03-22 (2020-03-07; 2020-04-20) | Undecided |
| Cluster 7 | 2020-07-04 (2020-06-08; 2020-07-10) | 2020-04-25 (2020-04-13; 2020-04-25) | After     |

Table A1: TMRCAs and parent TMRCAs of clusters on a global tree.

### Exponential Growth Rate

The estimates of the exponential growth rate  $f$  have been produced using BEAST v1.10.4 together with the corresponding 95% uncertainty (i.e. highest posterior density interval or HPDI) intervals. The results are presented in Table A2.

| Cluster | Model       | $\hat{f}$ & 95% HPDI (Annual) | $\hat{f}$ & 95% HPDI (Daily) |
|---------|-------------|-------------------------------|------------------------------|
| First   | Exp. Growth | 19.206 (8.301; 30.011)        | 0.052 (0.023; 0.082)         |
| Second  | Exp. Growth | 27.879 (6.499; 49.853)        | 0.076 (0.018; 0.136)         |
| Third   | Exp. Growth | 28.050 (10.470; 48.294)       | 0.077 (0.029; 0.132)         |

Table A2: Estimates of exponential growth rate for the Ukrainian SARS-CoV-2 for the three largest clusters.
